# Supplementary material for: Exploration of Antimicrobial Ingredients in Psoralea corylifolia L. Seed and Related Mechanism against Methicillin-Resistant Staphylococcus aureus
Source: MDPI journal article supplement (doi:10.3390/molecules27206952), 2022-10-17
Supplement: s1 [file s1]

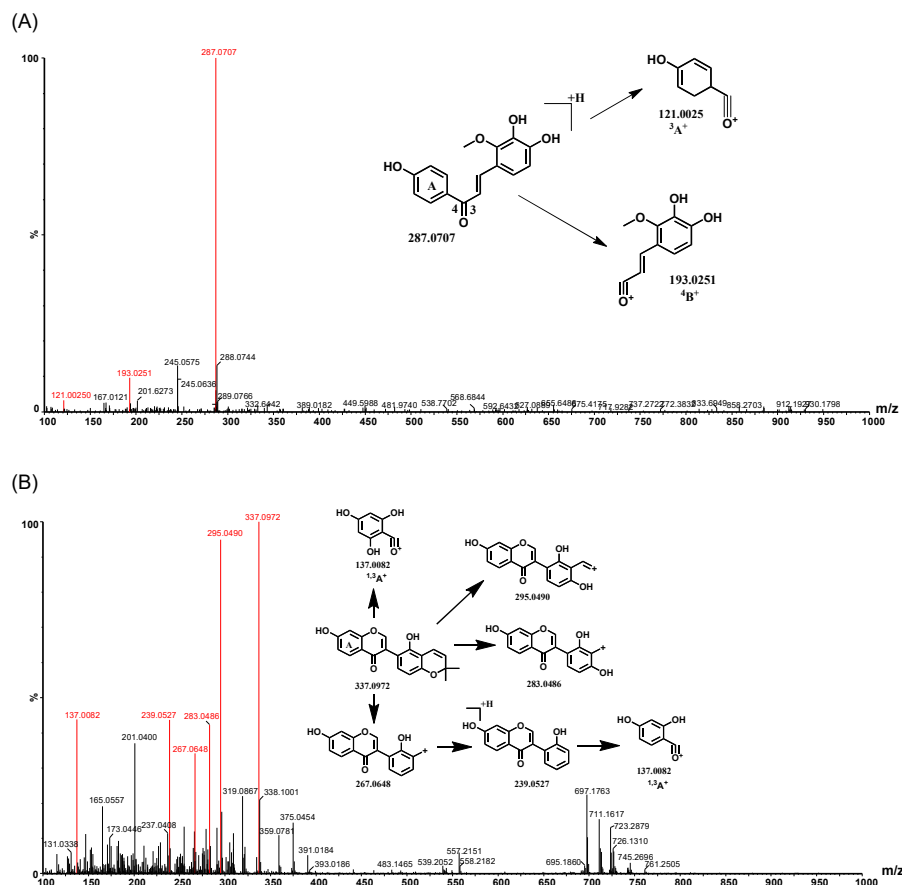

**Figure S1.** Typical fragments ions and the fragmentation pathway of reference flavonoids in PI mode. (A) licochalcone D and (B) glabrone.

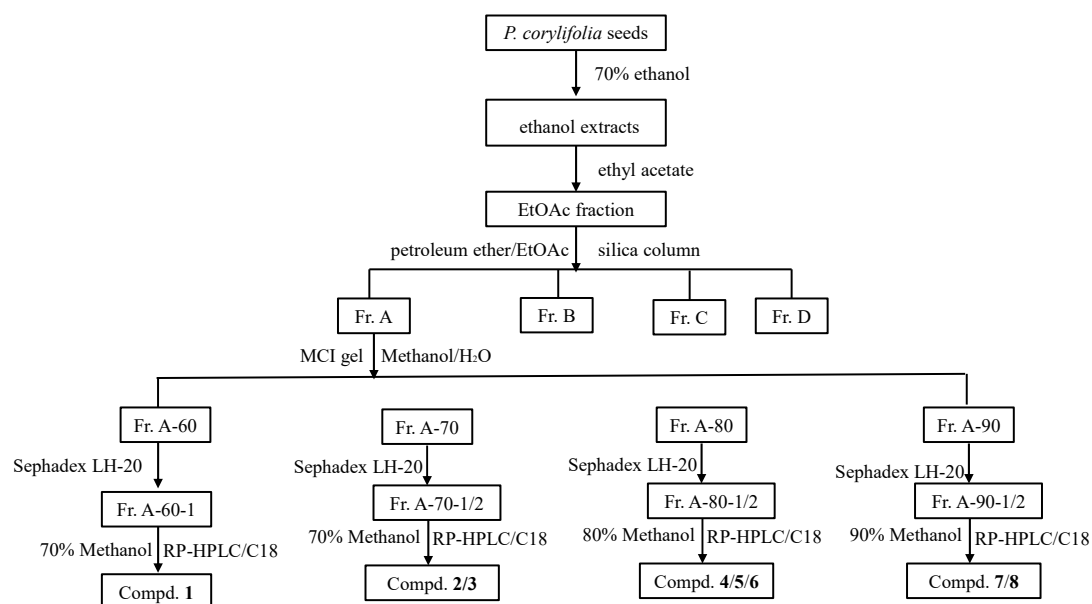

**Figure S2.** Separation process of Fr. A-D and compounds 1-8 from PCS.
